# Supplementary material
Source: PubMed Central journal article supplement (PMC4775989)
Supplement: AAC.01488-15_zac003164868so1.pdf [file AAC.01488-15_zac003164868so1.pdf]

# Supplemental Figure

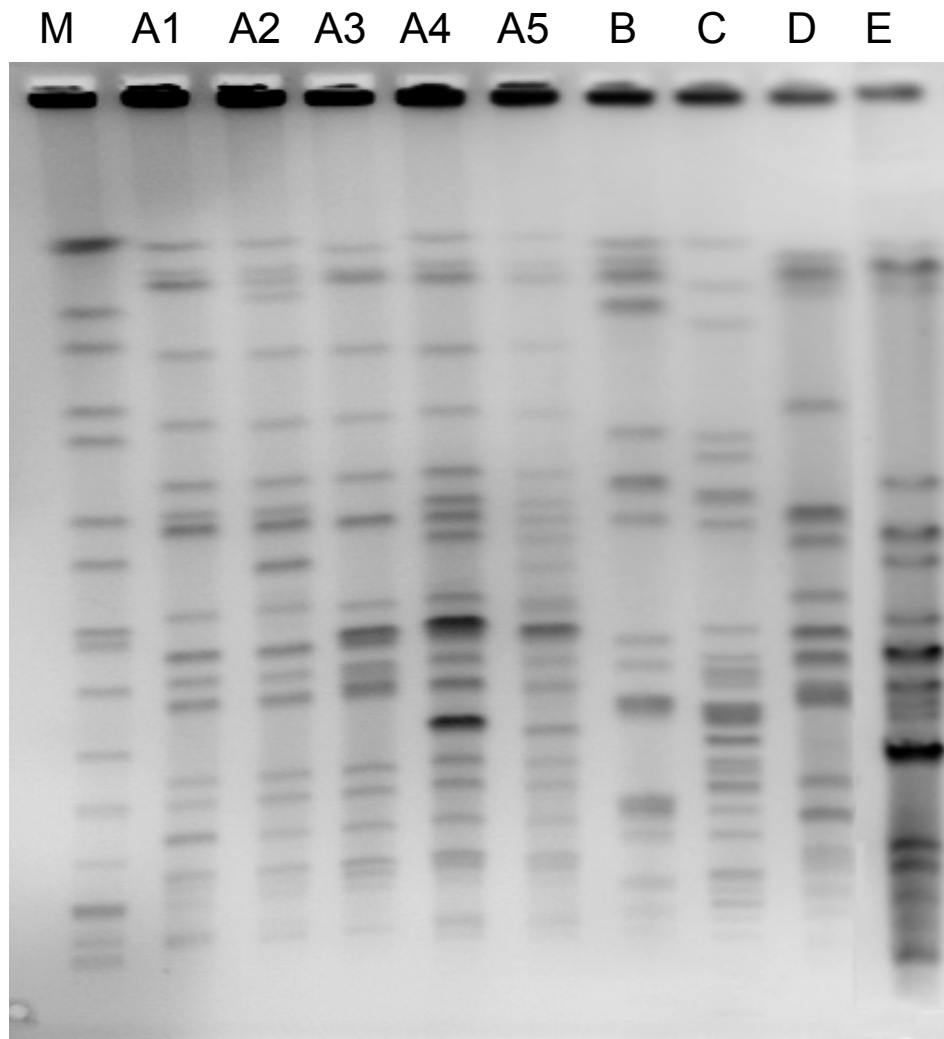

1a

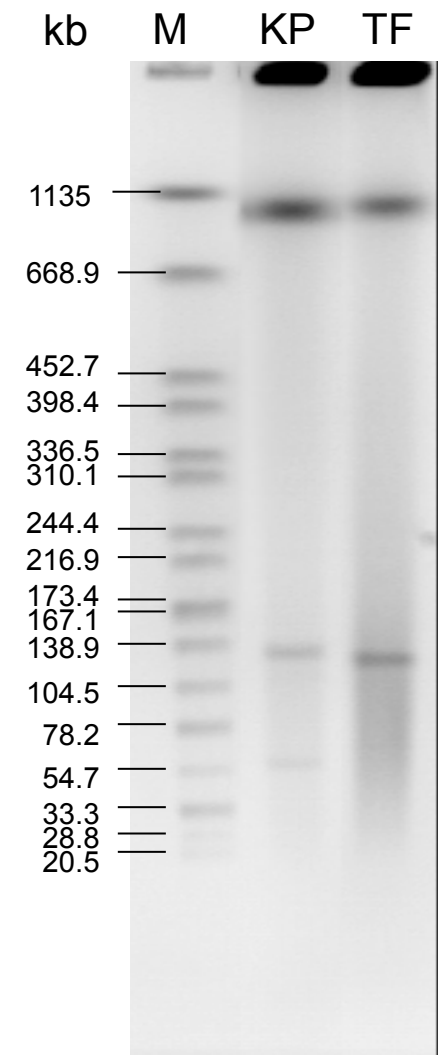

1b

**Supplemental Figure 1a.** PFGE patterns representing all pulsetypes of 57 fosfomycin-resistant KPC-KP strains. M, *Salmonella enterica* serotype Braenderup strain H9812; Lanes A to E, pulsetypes A to E. **1b.** Plasmid DNA profiles of *K. pneumoniae* KP1034 and its *E. coli* DH5α transformant. M, *Salmonella enterica* serotype Braenderup strain H9812; KP, KP1034; TF, *E. coli* DH5α transformant of KP1034.
